# Supplementary material for: Herbicide weed control increases nutrient leaching as compared to mechanical weeding in a large-scale oil palm plantation
Source: Copernicus journal article supplement (doi:10.5194/bg-2020-153), 2020-06-02
Supplement: Supplementary file [file bg-2020-153-AC2-supplement.pdf]

**Table A1** Parameters used for the Expert-N water sub-model for each management zone

|                                            | <b>Depth (cm)</b> | <b>Palm circle</b> | <b>Inter-row</b> | <b>FronD-<br/>stacked area</b> |
|--------------------------------------------|-------------------|--------------------|------------------|--------------------------------|
| <b>Interception</b>                        |                   |                    |                  |                                |
| Saturation capacity (mm d <sup>-1</sup> )  |                   | 8.4                | 4.7              | 4.7                            |
| Throughfall (%)                            |                   | 50                 | 10               | 10                             |
| <b>Plant water uptake</b>                  |                   |                    |                  |                                |
| Plant height (cm)                          |                   | 874                | 874              | 874                            |
| Leaf area index                            |                   | 3.64               | 1.8              | 0.75                           |
| Leaf number                                |                   | 40                 | 40               | 40                             |
| Aboveground biomass (kg ha <sup>-1</sup> ) |                   | 47400              | 47400            | 47400                          |
| Maximum rooting depth (cm)                 |                   | 100                | 50               | 50                             |
| Root biomass (kg ha <sup>-1</sup> )        |                   | 15600              | 15600            | 15600                          |
| Root partition (%)                         | 0–10              | 29                 | 29               | 29                             |
|                                            | 10–30             | 31                 | 31               | 31                             |
|                                            | 30–50             | 18                 | 18               | 18                             |
|                                            | 50–100            | 15                 | 15               | 15                             |
|                                            | 100–150           | 5                  | 5                | 5                              |
|                                            | 150–200           | 2                  | 2                | 2                              |
| <b>Soil properties</b>                     |                   |                    |                  |                                |
| Bulk density (g cm <sup>-3</sup> )         | 0–10              | 1.37               | 1.36             | 0.8                            |
|                                            | 10–30             | 1.36               | 1.36             | 1.26                           |
|                                            | 30–50             | 1.52               | 1.52             | 1.52                           |
|                                            | 50–100            | 1.50               | 1.50             | 1.50                           |
|                                            | 100–150           | 1.58               | 1.58             | 1.58                           |
|                                            | 150–200           | 1.46               | 1.46             | 1.46                           |
| Texture – Clay (%)                         | 0–10              | 15.8               | 15.8             | 15.8                           |
|                                            | 10–30             | 24.5               | 24.5             | 24.5                           |
|                                            | 30–50             | 37.5               | 37.5             | 37.5                           |
|                                            | 50–100            | 41.0               | 41.0             | 41.0                           |
|                                            | 100–150           | 43.3               | 43.3             | 43.3                           |
|                                            | 150–200           | 47.6               | 47.6             | 47.6                           |
| Texture – Sand (%)                         | 0–10              | 53.3               | 53.3             | 53.3                           |
|                                            | 10–30             | 47.6               | 47.6             | 47.6                           |
|                                            | 30–50             | 35.9               | 35.9             | 35.9                           |
|                                            | 50–100            | 34.4               | 34.4             | 34.4                           |
|                                            | 100–150           | 31.7               | 31.7             | 31.7                           |
|                                            | 150–200           | 29.8               | 29.8             | 29.8                           |
| Organic matter (%)                         | 0–10              | 3.2                | 2.9              | 8.7                            |
|                                            | 10–30             | 2.8                | 2.6              | 3.7                            |

|                                                           |         |       |       |       |
|-----------------------------------------------------------|---------|-------|-------|-------|
|                                                           | 30–50   | 2.0   | 1.6   | 2.0   |
|                                                           | 50–100  | 2.5   | 2.5   | 2.5   |
|                                                           | 100–150 | 2.0   | 2.0   | 2.0   |
|                                                           | 150–200 | 1.2   | 1.2   | 1.2   |
| Porosity (Vol %)                                          | 0–10    | 48.8  | 48.8  | 70.0  |
|                                                           | 10–30   | 45.7  | 45.7  | 45.7  |
|                                                           | 30–50   | 41.9  | 41.9  | 41.9  |
|                                                           | 50–100  | 43.3  | 43.3  | 43.3  |
|                                                           | 100–150 | 40.3  | 40.3  | 40.3  |
|                                                           | 150–200 | 45.0  | 45.0  | 45.0  |
| Field capacity (Vol %)                                    | 0–10    | 27.2  | 27.2  | 27.2  |
|                                                           | 10–30   | 27.4  | 27.4  | 27.4  |
|                                                           | 30–50   | 21.3  | 21.3  | 21.3  |
|                                                           | 50–100  | 23.1  | 23.1  | 23.1  |
|                                                           | 100–150 | 24.5  | 24.5  | 24.5  |
|                                                           | 150–200 | 28.1  | 28.1  | 28.1  |
| Wilting point (Vol %)                                     | 0–10    | 18.3  | 18.3  | 18.3  |
|                                                           | 10–30   | 17.3  | 17.3  | 17.3  |
|                                                           | 30–50   | 17.9  | 17.9  | 17.9  |
|                                                           | 50–100  | 17.3  | 17.3  | 17.3  |
|                                                           | 100–150 | 20.4  | 20.4  | 20.4  |
|                                                           | 150–200 | 24.5  | 24.5  | 24.5  |
| Saturated hydraulic conductivity<br>(mm d <sup>-1</sup> ) | 0–10    | 400   | 400   | 200   |
|                                                           | 10–30   | 200   | 200   | 400   |
|                                                           | 30–50   | 200   | 200   | 300   |
|                                                           | 50–100  | 150   | 150   | 150   |
|                                                           | 100–150 | 260   | 260   | 260   |
|                                                           | 150–200 | 260   | 260   | 260   |
| Van Genuchten $\alpha$ (cm <sup>-1</sup> )                | 0–10    | 0.059 | 0.059 | 0.059 |
|                                                           | 10–30   | 0.025 | 0.025 | 0.035 |
|                                                           | 30–50   | 0.010 | 0.010 | 0.020 |
|                                                           | 50–100  | 0.008 | 0.008 | 0.015 |
|                                                           | 100–150 | 0.021 | 0.021 | 0.021 |
|                                                           | 150–200 | 0.021 | 0.021 | 0.021 |
| Van Genuchten n                                           | 0–10    | 1.70  | 1.70  | 1.70  |
|                                                           | 10–30   | 1.71  | 1.71  | 1.81  |
|                                                           | 30–50   | 1.12  | 1.12  | 1.25  |
|                                                           | 50–100  | 1.09  | 1.09  | 1.15  |
|                                                           | 100–150 | 1.21  | 1.21  | 1.21  |
|                                                           | 150–200 | 1.23  | 1.23  | 1.23  |

---
